# Supplementary material for: Identification of YUC genes associated with leaf wrinkling trait in Tacai variety of Chinese cabbage
Source: PeerJ. 2024 May 20;12:e17337. doi: 10.7717/peerj.17337 (PMC11114110; doi:10.7717/peerj.17337)
Supplement: Supplemental Information 1 [file peerj-12-17337-s001.xlsx]

## Sheet: Table S1
Table S1 Primers used in this study
BrYUC6a-F	gagctcggtacccggggatccATGGAAGGTAAACTAGCACATGACT
BrYUC6a-R	gctcaccatgtcgactctagaACCGTCTAGTACTCTACTACATGCT
BrYUC3a-qF	TCCAAACTTCACCCCGAAGG
BrYUC3a-qR	TGTTTTGCCACAGAGAGGCT
BrYUC3b-qF	CGCTCAAGGGCTTAAGAGGT
BrYUC3b-qR	GCAATGTGTTGACCGGAACA
BrYUC3c-qF	GCAGCTCCGTTCATGTGCTA
BrYUC3c-qR	CAACGGTCCGATTGTCGGTCT
BrYUC6a-qF	GCTCAGCCTTCTCTCGTTGT
BrYUC6a-qR	CAACGAGTTGGATGGGCAAC
BrYUC6b-qF	TGAGGACTACGCCAAGAGGT
BrYUC6b-qR	CCAACCACCGGCAAACATAC
BrYUC6c-qF	TTCTGCGAGCTTCCGCTTAT
BrYUC6c-qR	TCGACCGTCTGACCAAACTC
BrYUC6-JD-F	ATCTCACCGGCAAAACTCCA
BrYUC6-JD-R	CGATGTTGTGGCGGATCTTG
