# Supplementary material for: Identification of YUC genes associated with leaf wrinkling trait in Tacai variety of Chinese cabbage
Source: PeerJ. 2024 May 20;12:e17337. doi: 10.7717/peerj.17337 (PMC11114110; doi:10.7717/peerj.17337)
Supplement: Supplemental Information 2 [file peerj-12-17337-s002.xls]

## Sheet: Sheet1
ITEM TO CHECK	IMPORTANCE	CHECKLIST
EXPERIMENTAL DESIGN
Definition of experimental and control groups	E	No
Number within each group	E	3
Assay carried out by core lab or investigator's lab?	D
Acknowledgement of authors' contributions	D
SAMPLE
Description	E	plant leaf
Volume/mass of sample processed	D
Microdissection or macrodissection	E	macrodissection
Processing procedure	E
If frozen - how and how quickly?	E	Immediately dispose of liquid nitrogen after sampling
If fixed - with what, how quickly?	E	No
Sample storage conditions and duration (especially for FFPE samples)	E	Store at- 80 degrees for 10 days
NUCLEIC ACID EXTRACTION
Procedure and/or instrumentation	E
Name of kit and details of any modifications	E	Trizol reagent kit (Invitrogen, Carlsbad, CA, USA)（page6，line231-238）
Source of additional reagents used	D
Details of DNase or RNAse treatment	E	DEPC treatment
Contamination assessment (DNA or RNA)	E	RNA quality was assessed on an Agilent 2100 Bioanalyzer (Agilent Technol ogies, Palo Alto, CA, USA) and checked using RNase-free agarose gel electrophoresis
Nucleic acid quantification	E	Nanodrop
Instrument and method	E	Nanodrop
Purity (A260/A280)	D
Yield	D
RNA integrity method/instrument	E
RIN/RQI or Cq of 3' and 5' transcripts	E	RIN/RQI
Electrophoresis traces	D
Inhibition testing (Cq dilutions, spike or other)	E	Cq dilutions
REVERSE TRANSCRIPTION
Complete reaction conditions	E	HiScript® II Q RT SuperMix for qPCR (+gDNA wiper) (R223-01, Vazyme, China)（page6，line231-238）
Amount of RNA and reaction volume	E	1μg，20μl
Priming oligonucleotide (if using GSP) and concentration	E	Random primers/Oligo (dT)23VN primer Mix
Reverse transcriptase and concentration	E	HiScript II Reverse Transcriptase
Temperature and time	E	Step 1:37 ° C, 15 min; Step 2:85℃, 5 sec
Manufacturer of reagents and catalogue numbers	D
Cqs with and without RT	D*
Storage conditions of cDNA	D
qPCR TARGET INFORMATION
If multiplex, efficiency and LOD of each assay.	E	No
Sequence accession number	E
Location of amplicon	D
Amplicon length	E	173
In silico specificity screen (BLAST, etc)	E	BLAST
Pseudogenes, retropseudogenes or other homologs?	D
Sequence alignment	D
Secondary structure analysis of amplicon	D
Location of each primer by exon or intron (if applicable)	E	No
What splice variants are targeted?	E	No
qPCR OLIGONUCLEOTIDES
Primer sequences	E	F： 5‘-TCCAAACTTCACCCCGAAGG-3’；R： 5‘-AGCCTCTCTGTGGCAAAACA-3’
RTPrimerDB Identification Number	D
Probe sequences	D**
Location and identity of any modifications	E	No
Manufacturer of oligonucleotides	D
Purification method	D
qPCR PROTOCOL
Complete reaction conditions	E
Reaction volume and amount of cDNA/DNA	E	cDNA100ng，20μl
Primer, (probe), Mg++ and dNTP concentrations	E	0.2μM；
Polymerase identity and concentration	E	2X SYBR Green Pro Taq HS Premix
Buffer/kit identity and manufacturer	E	SYBR Green Premix Pro Taq HS qPCR Kit（AG11701，AG，China）
Exact chemical constitution of the buffer	D
Additives (SYBR Green I, DMSO, etc.)	E	SYBR Green I
Manufacturer of plates/tubes and catalog number	D
Complete thermocycling parameters	E	40
Reaction setup (manual/robotic)	D
Manufacturer of qPCR instrument	E	CFX96 Real-Time System (Bio-Rad, Cali fornia, USA)（page6，line231-238）
qPCR VALIDATION
Evidence of optimisation (from gradients)	D
Specificity (gel, sequence, melt, or digest)	E	gel
For SYBR Green I, Cq of the NTC	E	30
Standard curves with slope and y-intercept	E
PCR efficiency calculated from slope	E	0.997
Confidence interval for PCR efficiency or standard error	D
r2 of standard curve	E	0.998
Linear dynamic range	E
Cq variation at lower limit	E
Confidence intervals throughout range	D
Evidence for limit of detection	E
If multiplex, efficiency and LOD of each assay.	E
DATA ANALYSIS
qPCR analysis program (source, version)	E
Cq method determination	E	2− ΔΔCt
Outlier identification and disposition	E	testing hypotheses using a controlled significance level
Results of NTCs	E
Justification of number and choice of reference genes	E	Widely used BrUBC10 was used as the reference gene
Description of normalisation method	E	calculated and analyzed using ANOVA and SPSS 22.0 software
Number and concordance of biological replicates	D
Number and stage (RT or qPCR) of technical replicates	E	3
Repeatability (intra-assay variation)	E	0.9
Reproducibility (inter-assay variation, %CV)	D
Power analysis	D
Statistical methods for result significance	E	ANOVA and SPSS 22.0 software
Software (source, version)	E	ANOVA and SPSS 22.0 software
Cq or raw data submission using RDML	D
Table 1. MIQE checklist for authors, reviewers and editors. All essential information (E) must be submitted with the manuscript. Desirable
information (D) should be submitted if available. If using primers obtained from RTPrimerDB, information on qPCR target, oligonucleotides,
protocols and validation is available from that source.
*: Assessing the absence of DNA using a no RT assay is essential when first extracting RNA. Once the sample has been validated as
RDNA-free, inclusion of a no-RT control is desirable, but no longer essential.
**: Disclosure of the probe sequence is highly desirable and strongly encouraged. However, since not all commercial pre-designed assay
vendors provide this information, it cannot be an essential requirement. Use of such assays is advised against.
