# Supplementary material for: Identification of YUC genes associated with leaf wrinkling trait in Tacai variety of Chinese cabbage
Source: PeerJ. 2024 May 20;12:e17337. doi: 10.7717/peerj.17337 (PMC11114110; doi:10.7717/peerj.17337)
Supplement: Supplemental Information 3 [file peerj-12-17337-s003.xlsx]

## Sheet: Fig4D
geneID	root	stem	leaf	flower	silique	callus
BraWTC_YUC1a	1.817	0.09	0	0.059	0.16	0.191
BraWTC_YUC1b	0.045	0.063	0	0.187	0	0
BraWTC_YUC3a	0	0	0	0	0	0
BraWTC_YUC3b	35.371	39.689	6.826	12.54	9.785	131.473
BraWTC_YUC3c	0.726	0	0.017	0	0	0.284
BraWTC_YUC4a	0.014	1.503	0.069	0.328	0.074	0.176
BraWTC_YUC4b	0.028	0.653	0	0	1.664	0
BraWTC_YUC5a	3.735	0.125	0.062	0.082	0	0.176
BraWTC_YUC5b	0.755	0	0	0	0	0
BraWTC_YUC6a	5.091	2.432	1.547	4.194	0.589	1.349
BraWTC_YUC6b	10.803	0.878	0.469	1.033	1.111	0.232
BraWTC_YUC6c	5.214	1.203	0.445	3.497	3.325	0.8
BraWTC_YUC7	0.543	0	0	0.133	0	0.287
BraWTC_YUC8a	2.908	0.541	0.115	12.658	0	0.408
BraWTC_YUC8b	1.447	0	0	1.695	0	0
BraWTC_YUC9a	1.503	0.376	0.251	0	0	0
BraWTC_YUC9b	0.182	0.128	0.232	0	0.34	0.09
BraWTC_YUC10	0	0	0	0	5.152	0

## Sheet: Fig4E
geneID	#ID	H1-1-1	H1-1-2	H1-1-3	H1-2-1	H1-2-2	H1-2-3	H5-1-1	H5-1-2	H5-1-3	H5-2-1	H5-2-2	H5-2-3
BraWTC_YUC10	BraA06g004240.3.5C	0	0	0	0	0	0	0	0	0	0	0	0
BraWTC_YUC1a	BraA01g005590.3.5C	3.86096	4.57294	3.45552	1.62181	1.22704	0.796727	5.95611	4.15513	4.78407	2.27641	3.30542	2.97501
BraWTC_YUC1b	BraA08g017530.3.5C	1.03682	1.26107	1.53968	0.321385	0.320716	0.175269	1.40233	3.03579	1.49297	0.623073	0.64481	1.06652
BraWTC_YUC3a	BraA05g011610.3.5C	0	0	0	0	0	0	0	0	0	0	0	0
BraWTC_YUC3b	BraA09g026630.3.5C	5.70387	8.52581	7.60477	4.89215	5.57536	4.89563	14.185	11.2516	13.8026	18.6371	15.5206	19.1972
BraWTC_YUC3c	BraA10g003050.3.5C	0	0	0	0	0	0.093483	0.040876	0	0	0	0.043691	0
BraWTC_YUC4a	BraA02g003940.3.5C	5.02255	4.43835	3.11393	2.79945	3.16719	3.72974	2.04854	2.3153	2.13137	2.65251	2.77466	2.52995
BraWTC_YUC4b	BraA10g026890.3.5C	3.99403	5.04697	4.88891	3.01966	2.30831	2.82433	2.0546	2.83378	2.41132	1.79536	2.56374	2.92937
BraWTC_YUC5a	BraA02g032090.3.5C	0	0	0	0	0.1803	0	0	0	0	0	0.102406	0
BraWTC_YUC5b	BraA06g044930.3.5C	0	0	0	0	0	0	0	0	0	0	0	0
BraWTC_YUC6a	BraA02g043250.3.5C	5.2409	4.95808	4.65858	4.404	4.94375	5.43368	4.19857	4.0387	5.14886	7.58861	7.58423	7.31041
BraWTC_YUC6b	BraA06g034180.3.5C	3.95749	4.30546	5.64631	2.754	2.65485	3.12133	7.38336	6.39946	6.68132	5.61058	4.61285	5.38308
BraWTC_YUC6c	BraA09g005960.3.5C	3.94139	4.20992	2.83361	2.84747	3.22204	3.55509	7.31907	5.71312	4.70205	5.42619	4.91715	5.8111
BraWTC_YUC7	BraA09g066490.3.5C	0.142834	0	0	0	0	0	0	0	0	0.054474	0	0
BraWTC_YUC8a	BraA01g008770.3.5C	0.330675	0.104665	0.27481	0.155648	0.032965	0.288641	0.732221	0.406429	0.162741	0.534723	0.228787	0.285136
BraWTC_YUC8b	BraA08g019320.3.5C	0	0	0	0	0	0	0	0	0	0	0	0.065134
BraWTC_YUC9a	BraA09g066720.3.5C	0.266538	0.487052	0.163209	0	0.444842	0.797649	0.033289	0.071332	0.109372	0.256312	0.076556	0.147979
BraWTC_YUC9b	BraA10g002620.3.5C	0.185729	0	0	0.247118	0.101835	0	0	0	0	0.09293	0.070875	0.08926
E:
E:

## Sheet: Fig4G
	UBC10				yuc3a
HXW-L1	23.66	23.36	23.05	HXW-L1	35.02	35.12	34.99
HXW-L3	22.21	21.87	21.87	HXW-L3	36.66	36.43	37.07
HXW-L5	24.78	24.26	24.3	HXW-L5	37.02	36.97	37.42
HXW-L7	22.31	22.23	22.25	HXW-L7	38.88	39.15	39.08
HXW-L9	21.69	21.91	21.87	HXW-L9	35.55	36.01	35.76
	UBC10				yuc3b
HXW-L1	24.2	23.95	24.05	HXW-L1	32.42	32.32	32.83
HXW-L3	23.22	22.73	23.01	HXW-L3	31.06	31.15	31.33
HXW-L5	24.64	23.94	23.98	HXW-L5	33.67	33.61	34.3
HXW-L7	23.01	22.96	23.02	HXW-L7	32.19	31.83	31.62
HXW-L9	23.01	22.98	23.33	HXW-L9	33.89	33.82	34.24
	UBC10				yuc3c
HXW-L1	23.54	24.03	23.91	HXW-L1	35.66	36.03	35.9
HXW-L3	22.24	22.11	22.6	HXW-L3	36.4	35.9	36.2
HXW-L5	23.86	23.78	23.76	HXW-L5	36.8	37.1	36.9
HXW-L7	23.2	23.3	22.98	HXW-L7	36.75	36.3	36.4
HXW-L9	23.28	23.14	23.41	HXW-L9	36.92	36.8	36.88
	UBC10				yuc6a				yuc6b				yuc6c
HXW-L1	22.35	22.15	22.21	HXW-L1	27.45	27.62	28.36	HXW-L1	37.45	38.41	36.89	HXW-L1	39.79	39.72	38.96
HXW-L3	26.02	26.29	25.83	HXW-L3	27.28	27.29	27.24	HXW-L3	37.18	37.29	37.1	HXW-L3	33.73	34.33	34.03
HXW-L5	25.14	24.91	25.09	HXW-L5	27.42	27.24	25.77	HXW-L5	36.18	35.48	35.68	HXW-L5	34.62	34.42	33.92
HXW-L7	23.72	23.74	24.35	HXW-L7	27.48	28.15	27.47	HXW-L7	36.63	35.14	34.18	HXW-L7	35.06	36.85	35.81
HXW-L9	23.97	23.99	24.07	HXW-L9	27.05	27.18	27.46	HXW-L9	34.88	34.84	34.97	HXW-L9	34.77	35.79	35.04

## Sheet: Fig4H
	UBC10				yuc3a
YQSJ-L1	17.18	17.26	16.76	YQSJ-L1	36.77	35.99	36.32
YQSJ-L3	17.9	17.53	17.31	YQSJ-L3	37.92	37.88	37.64
YQSJ-L5	17.96	17.24	16.88	YQSJ-L5	36.21	36.42	36.22
YQSJ-L7	16.22	16.44	16.14	YQSJ-L7	37.02	37.21	36.98
YQSJ-L9	17.87	18.1	17.76	YQSJ-L9	37.64	37.54	37.44
	UBC10				yuc3b
YQSJ-L1	17.29	17.64	17.5	YQSJ-L1	36.22	36.41	36.26
YQSJ-L3	17.51	17.18	17.14	YQSJ-L3	36.49	36.44	36.2
YQSJ-L5	16.99	17.02	17.04	YQSJ-L5	36.67	36.89	36.88
YQSJ-L7	18.66	18.5	18.74	YQSJ-L7	38.24	38.89	37.42
YQSJ-L9	20.78	21	20.19	YQSJ-L9	39.05	38.2	39.52
	UBC10				yuc3c
YQSJ-L1	19.56	19.65	19.76	YQSJ-L1	39.42	39.12	39.33
YQSJ-L3	19.03	18.68	18.53	YQSJ-L3	38.42	38.44	38.32
YQSJ-L5	18.7	18.25	18.09	YQSJ-L5	37.57	37.66	37.4
YQSJ-L7	17.76	17.82	18.18	YQSJ-L7	36.2	36.43	35.22
YQSJ-L9	19.36	19.6	19.81	YQSJ-L9	37.13	37.23	37.22
	UBC10				yuc6a				yuc6b				yuc6c
YQSJ-L1	18.75	18.5	18.63	YQSJ-L1	28	27.34	27.19	YQSJ-L1	29.28	29.17	29.45	YQSJ-L1	28.04	28.03	28.29
YQSJ-L3	17.81	18.14	17.9	YQSJ-L3	26.27	26.36	26.38	YQSJ-L3	28.43	28.51	27.98	YQSJ-L3	26.18	26.74	26.84
YQSJ-L5	18.59	18.27	18.46	YQSJ-L5	27.54	27.41	27.85	YQSJ-L5	28.88	29.75	29.18	YQSJ-L5	27.85	28.03	27.8
YQSJ-L7	17.91	17.58	17.79	YQSJ-L7	26.85	26.89	27.16	YQSJ-L7	28.13	28.35	28.04	YQSJ-L7	27.41	27.49	27.72
YQSJ-L9	19.77	19.5	19.49	YQSJ-L9	27.66	27.68	27.77	YQSJ-L9	29.26	28.55	28.68	YQSJ-L9	28.39	28.18	28.17

## Sheet: Fig5A
	UBC10				yuc6a
BrYUC6aOE#3	18.45	18.27	18.37	BrYUC6aOE#3	27.52	27.57	27.64
BrYUC6aOE#9	18.13	18.47	18.5	BrYUC6aOE#9	25.77	23.18	25.24
BrYUC6aOE #17	18.25	18.08	17.93	BrYUC6aOE #17	28.14	28.11	27.92
WT	20.08	20.22	20.08	WT	31.31	31.19	31.12
